# Supplementary material for: A Pickering emulsion of a bifunctional interface prepared from Pd nanoparticles supported on silicane-modified graphene oxide: an efficient catalyst for water-mediated catalytic hydrogenation
Source: Royal Society of Chemistry journal article supplement (doi:10.1039/c9cy02002k), 2019-12-26
Supplement: c9cy02002k1.pdf [file c9cy02002k1.pdf]

## Supporting Information

### A Pickering Emulsion of Bifunctional Interface Prepared by Pd Nanoparticles Supported on Silicane-Modified Graphene Oxide: An Efficient Catalyst for Water-Mediated Catalytic Hydrogenation

Bing Xue, Tongchun Xu, Dongsheng Li, Jie Xu, Yongxin Li \*, Fei Wang and Jie Zhu\*

Jiangsu Key Laboratory of Advanced Catalytic Materials and Technology, School of Petrochemical Engineering, Changzhou University, Gehu Middle Road 21, Changzhou, Jiangsu 213164, PR China.

E-mail: [liyxluck@163.com](mailto:liyxluck@163.com) (Y. Li)

**Figure S1.** Optical micrograph of Pd/GO-Si-2.0g stabilized Pickering emulsion.

**Figure S2.** Contact angles of water (a) and CAL (b) on Pd/GO-Si-2.0g surface.

**Figure S3.** Optical micrograph of Pd/SBA-15-Si stabilized Pickering emulsion.

**Figure S4.** Contact angles of water (a) and CAL (b) on Pd/SBA-15-Si surface.

**Figure S5.** Effects of temperature and pressure on selective hydrogenation of CAL over Pd/GO-Si stabilized Pickering emulsion.

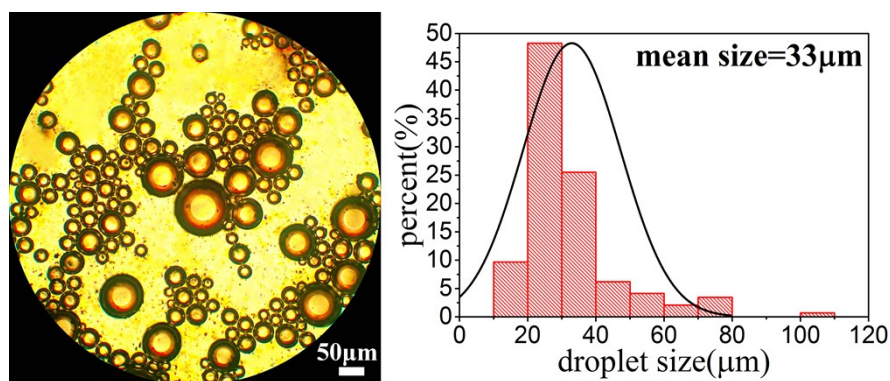

**Figure S1.** Optical micrograph of Pd/GO-Si-2.0g stabilized Pickering emulsion.

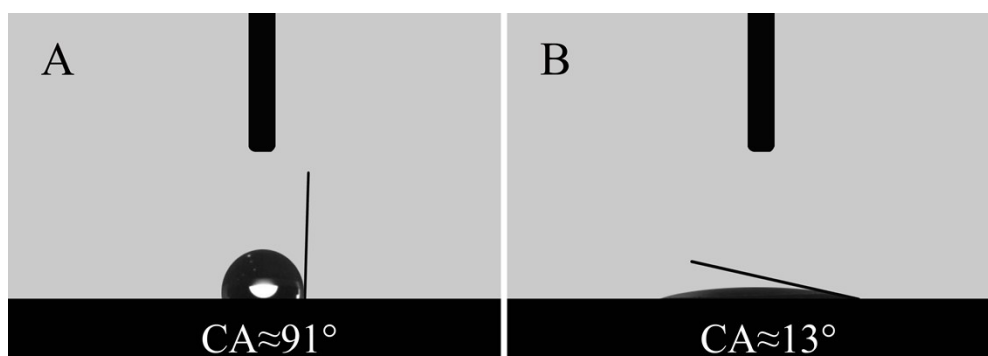

**Figure S2.** Contact angles of water (a) and CAL (b) on Pd/GO-Si-2.0g surface.

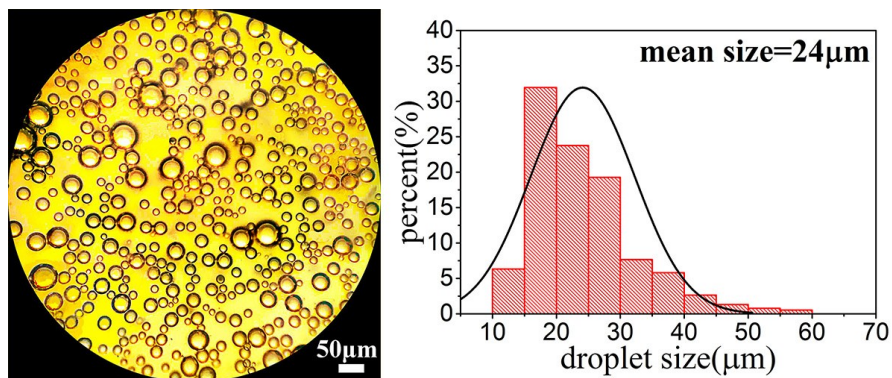

**Figure S3.** Optical micrograph of Pd/SBA-15-Si stabilized Pickering emulsion.

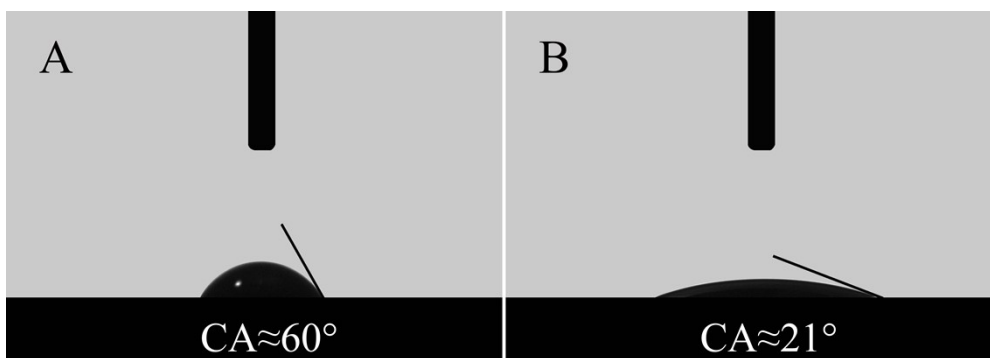

**Figure S4.** Contact angles of water (a) and CAL (b) on Pd/SBA-15-Si surface.

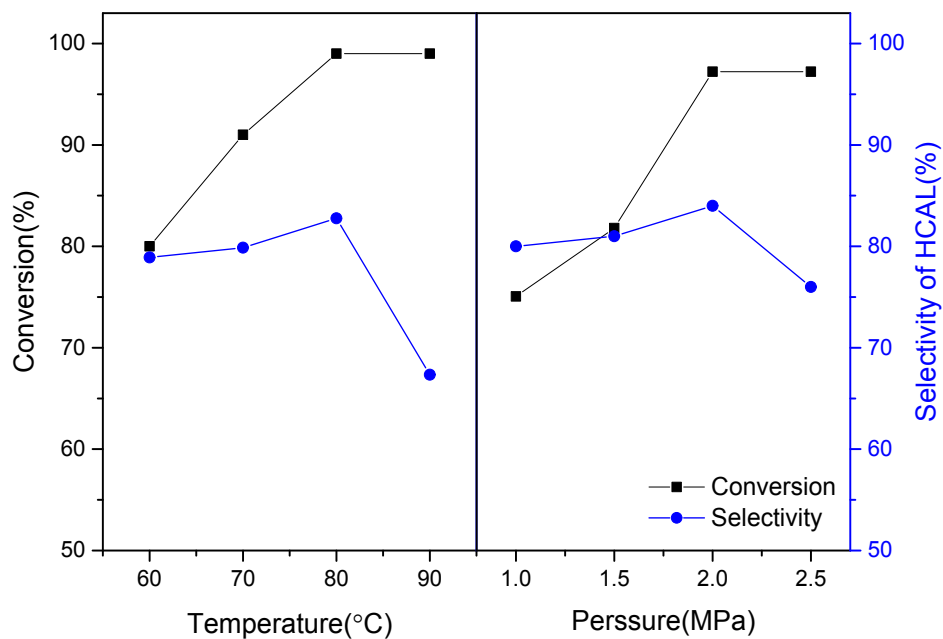

**Figure S5.** Effects of temperature and pressure on selective hydrogenation of CAL over Pd/GO-Si stabilized Pickering emulsion.
